# Supplementary material
Source: ML conference proceedings conference paper supplement (https://www.ecva.net/papers/eccv_2022/papers_ECCV/html/136760351_ECCV_2022_paper.php)
Supplement: Supplementary file 2 [file 136760351-supp.zip]

Archive with 5 entries (3 files):
- 4330-supp/
- 4330-supp/4330-supp.pdf
- 4330-supp/demo_video/
- 4330-supp/demo_video/paper_fig6_demo.mp4
- 4330-supp/demo_video/supplementary_fig1_demo.mp4
